# Supplementary material for: New Insights into Avian Infectious Bronchitis Virus in Colombia from Whole-Genome Analysis
Source: MDPI journal article supplement (doi:10.3390/v14112562), 2022-11-19
Supplement: s1 [file s1]

**Table S1.** Read filtering and assembly statistics for IBV isolates included in the study.

| <b>Sample</b>  | <b>Paired Reads</b> | <b>% Clean Reads</b> | <b>% Reads that generated IBV contigs</b> | <b>Final assembly Size (nt)</b> |
|----------------|---------------------|----------------------|-------------------------------------------|---------------------------------|
| V2             | 2,108,222           | 75.7                 | 66.84                                     | 25,531                          |
| V3             | 985,232             | 96.1                 | 81.98                                     | 27,625                          |
| V5             | 1,956,368           | 87.1                 | 44.35                                     | 24,102                          |
| V6             | 2,027,026           | 86.3                 | 7.86                                      | 27,532                          |
| V8             | 2,451,922           | 77.5                 | 88.37                                     | 27,559                          |
| V9             | 1,070,220           | 93.8                 | 85.78                                     | 25,783                          |
| V10            | 1,261,698           | 92.2                 | 38.85                                     | 27,558                          |
| <b>Average</b> | <b>1,694,384</b>    | <b>87.0</b>          | <b>59.15</b>                              | <b>26,527</b>                   |
